# Supplementary material for: A Salt Overly Sensitive Pathway Member from Brassica juncea BjSOS3 Can Functionally Complement ΔAtsos3 in Arabidopsis
Source: PubMed Central journal article supplement — Curr Genomics. 2018 Jan;19(1):60–9. doi: 10.2174/1389202918666170228133621 (PMC5817878; doi:10.2174/1389202918666170228133621), 2018-01
Supplement: CG-19-60_SD1.pdf [file CG-19-60_SD1.pdf]

## Supplementary Material

A Salt Overly Sensitive Pathway Member from *Brassica juncea* BjSOS3 Can Functionally Complement  $\Delta$ Atsos3 in ArabidopsisKamlesh Kant Nutan<sup>1</sup>, Gautam Kumar<sup>1</sup>, Sneh Lata Singla-Pareek<sup>2</sup> and Ashwani Pareek<sup>1,\*</sup><sup>1</sup>Stress Physiology and Molecular Biology Laboratory, School of Life Sciences, Jawaharlal Nehru University, New Delhi 110067, India; <sup>2</sup>Plant Stress Biology, International Centre for Genetic Engineering and Biotechnology, Aruna Asaf Ali Road, New Delhi 110067, India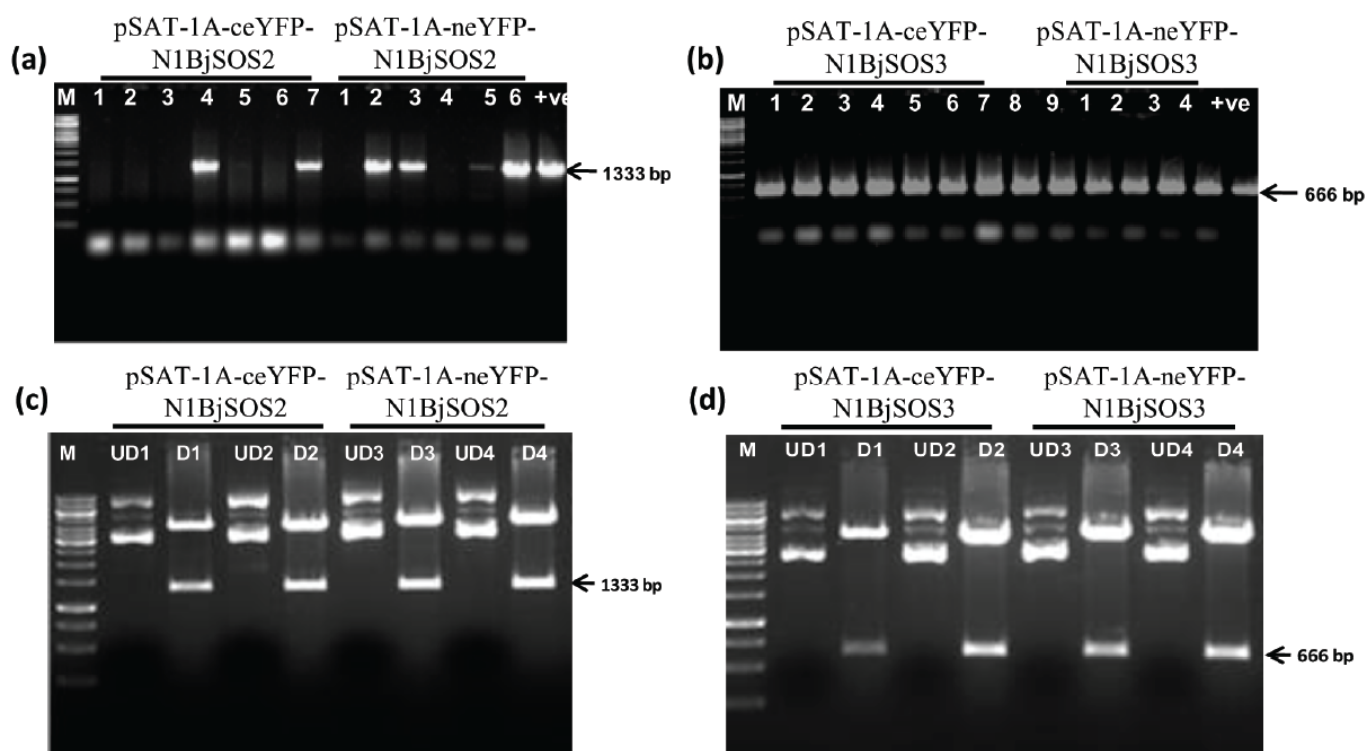

**Fig. (S1).** Cloning of full length *BjSOS3* and *BjSOS2* into pSAT-1A-neYFP and pSAT-1A-ceYFP vectors. (a). Ethidium bromide stained agarose gel showing colony PCR to confirm the presence of full length *BjSOS2* gene. A positive amplicon of 1333 bp was obtained. (b). Ethidium bromide stained agarose gel showing colony PCR to confirm the presence of full length *BjSOS3* gene. A positive amplicon of 666 bp was obtained. (c). Ethidium bromide stained agarose gel showing restriction digestion of the plasmid to confirm the presence of full length *BjSOS2* gene. A fall out of 1333 bp was obtained. (d). Ethidium bromide stained agarose gel showing restriction digestion of the plasmid to confirm the presence of full length *BjSOS3* gene. A fall out of 666 bp was obtained. M, marker; 1-9, various colonies; D1-D4, Digested PCR confirmed plasmid; UD1-UD4, Undigested PCR confirmed plasmid.

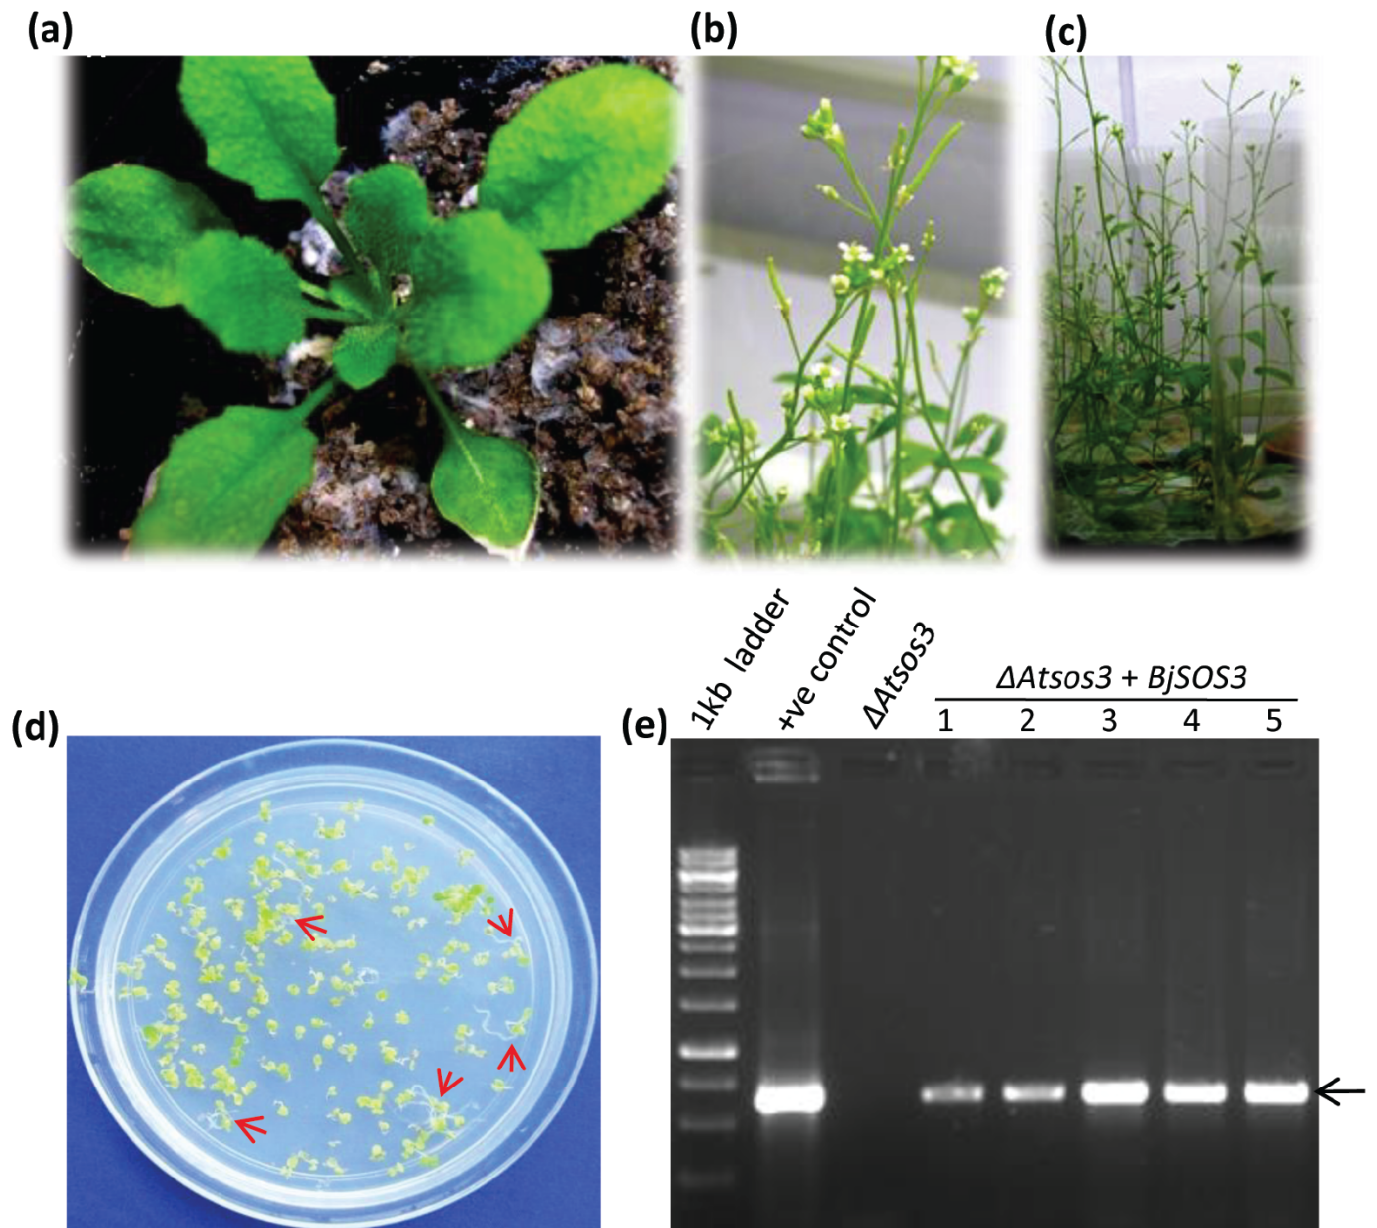

**Fig. (S2).** Transformation and screening of *Arabidopsis thaliana* by floral dip method. (a). *Arabidopsis thaliana*  $\Delta$ *Atsos3* mutant grown in plastic pot (b). Transformation of the  $\Delta$ *Atsos3* mutant with *BjsSOS3* by floral dipping at a stage when a pot of healthy plants contains approximately 10–20 inflorescence and some maturing siliques. (c). Dry and harvest seeds from transformants. (d). Transformed T1 seeds germinated on MS plates with hygromycin. Arrow is pointed towards the seedlings showing phenotypic positive characters of a transgenic. (e). Ethidium bromide stained agarose gel showing amplified *BjsSOS3* gene using tissue PCR to confirm the presence of full length *BjsSOS3* gene in the  $\Delta$ *Atsos3* mutant background. A positive amplicon of 633 bp was obtained (shown by arrow).
